# Supplementary material for: Uterine Flushing Fluid-Derived Let-7b Targets CXCL10 to Regulate Uterine Receptivity in Goats during Embryo Implantation
Source: MDPI journal article supplement (doi:10.3390/ijms24032799), 2023-02-01
Supplement: s1 [file s1]

**Table S1.** Differentially expressed miRNA.

| Gene ID             | log2<br>(D18P /<br>D15P) | Qvalue<br>(D18P /<br>D15P) | log2<br>(D15P /<br>D5P) | Qvalue<br>(D15P /<br>D5P) | log2<br>(D18P /<br>D5P) | Qvalue<br>(D18P /<br>D5P) |
|---------------------|--------------------------|----------------------------|-------------------------|---------------------------|-------------------------|---------------------------|
| chi-let-7a-5p       |                          |                            | -4.3165078<br>19        | 7.91E-05                  | -9.6384359<br>14        | 1.23E-05                  |
| chi-let-7b-5p       | -11.328113<br>89         | 6.14E-18                   | 2.5500367<br>65         | 1.47E-29                  | -8.7780771<br>3         | 0.00213525                |
| chi-let-7c-5p       | -8.5660540<br>38         | 5.70E-04                   | 8.5660540<br>38         | 1.74E-06                  |                         |                           |
| chi-let-7f-5p       | 8.76155123<br>2          | 1.06E-05                   |                         |                           | 8.7615512<br>32         | 1.32E-09                  |
| chi-let-7i-5p       | 8.68299458<br>4          | 1.85E-05                   |                         |                           | 2.3431445<br>81         | 1.37E-08                  |
| chi-miR-106<br>b-3p |                          |                            | -10.308339<br>03        | 1.82E-08                  | -10.308339<br>03        | 1.17E-08                  |
| chi-miR-127-<br>3p  | -8.3353903<br>55         | 0.006179092                | 8.3353903<br>55         | 9.85E-05                  |                         |                           |
| chi-miR-130<br>6-3p | -2.7376657<br>62         | 1.23E-04                   | 2.2001646<br>15         | 2.34E-12                  | -0.5375011<br>47        | 0.047456169               |
| chi-miR-136-<br>5p  |                          |                            | -10.520618<br>68        | 1.27E-09                  | -10.520618<br>68        | 8.26E-10                  |
| chi-miR-151-<br>3p  | 4.97297978<br>6          | 1.55E-11                   | -7.1059085<br>09        | 1.42E-28                  | -2.1329287<br>23        | 0.027668333               |
| chi-miR-16a-<br>5p  |                          |                            | -4.7813597<br>14        | 5.91E-07                  | -10.103287<br>81        | 7.26E-08                  |
| chi-miR-191-<br>5p  |                          |                            | -9.3641346<br>55        | 1.08E-04                  | -9.3641346<br>55        | 8.70E-05                  |
| chi-miR-193<br>b-3p | 9.21431912<br>1          | 2.27E-07                   |                         |                           | 4.4594316<br>19         | 5.78E-13                  |
| chi-miR-199<br>a-3p | -8.9218409<br>37         | 5.70E-04                   | 8.9218409<br>37         | 1.74E-06                  |                         |                           |
| chi-miR-199<br>a-5p | -2.7304061<br>06         | 0                          | -0.3824395<br>06        | 3.44E-235                 | -3.1128456<br>12        | 0                         |
| chi-miR-199<br>b-5p | -1.9949266<br>97         | 4.09E-108                  | -2.1052635<br>96        | 0                         | -4.1001902<br>94        | 0                         |
| chi-miR-199<br>c-5p | 12.3196721<br>2          | 7.52E-44                   |                         |                           | 12.319672<br>12         | 3.80E-68                  |
| chi-miR-204-<br>5p  | -9.0361736<br>13         | 3.22E-04                   | 9.0361736<br>13         | 6.67E-07                  |                         |                           |
| chi-miR-21-5<br>p   | -2.3953012<br>81         | 0.314781462                | -4.7785387<br>7         | 7.50E-19                  | -7.1738400<br>51        | 1.32E-21                  |
| chi-miR-218         |                          |                            | -8.8856963<br>73        | 0.001176072               | -8.8856963<br>73        | 9.99E-04                  |
| chi-miR-25-3<br>p   | 8.42206476<br>6          | 1.04E-04                   | -7.7615512<br>32        | 0.076004804               | 0.6605135<br>34         | 4.66E-05                  |
| chi-miR-26a-        | 1.33560303               | 6.26E-08                   | 0.6567952               | 0.006721222               | 1.9923982               | 2.04E-23                  |

|                      |              |             |              |             |              |           |
|----------------------|--------------|-------------|--------------|-------------|--------------|-----------|
| 5p                   | 2            |             | 45           |             | 77           |           |
| chi-miR-26b-5p       | 9.269126679  | 1.36E-07    |              |             | 9.269126679  | 8.24E-13  |
| chi-miR-30c-5p       |              |             | -9.296916207 | 1.57E-04    | -9.296916207 | 1.29E-04  |
| chi-miR-320-3p       | -9.796039609 | 1.96E-06    | 9.796039609  | 1.50E-10    |              |           |
| chi-miR-331-3p       | -9.859534786 | 1.15E-06    | -1.604500366 | 0.014935635 | -11.46403515 | 4.43E-18  |
| chi-miR-3431-5p      |              |             | -10.29806257 | 2.51E-08    | -10.29806257 | 1.60E-08  |
| chi-miR-345-3p       |              |             | -9.786269628 | 5.18E-06    | -9.786269628 | 3.72E-06  |
| chi-miR-451-5p       |              |             | -9.098032083 | 3.50E-04    | -9.098032083 | 2.89E-04  |
| chi-miR-7-5p         | 8.515699838  | 5.88E-05    |              |             | 8.515699838  | 2.14E-08  |
| chi-miR-92a-3p       | 9.098032083  | 6.71E-07    | -8.885696373 | 0.001176072 | 0.21233571   | 1.26E-05  |
| novel-chi-miR1172-5p | 12.64227738  | 1.72E-52    | -8.098032083 | 0.024716259 | 4.544245296  | 7.44E-128 |
| novel-chi-miR1207-5p | 7.515699838  | 0.006301391 |              |             | 7.515699838  | 7.77E-05  |
| novel-chi-miR1273-3p | 1.76106127   | 0.006436468 |              |             | 8.330916878  | 1.51E-07  |
| novel-chi-miR1344-5p | -1.246121238 | 1.00E-08    | 13.19521839  | 9.22E-85    | 11.94909716  | 5.33E-56  |
| novel-chi-miR1412-5p | 0.951737925  | 8.27E-17    | 2.707819249  | 1.94E-37    | 3.659557173  | 2.66E-110 |
| novel-chi-miR1453-5p | 11.87382857  | 3.48E-34    |              |             | 11.87382857  | 9.45E-54  |
| novel-chi-miR1612-5p | 8.21916852   | 3.29E-04    |              |             | 8.21916852   | 4.10E-07  |
| novel-chi-miR1739-3p | 6.146133512  | 2.08E-298   | 2.379213836  | 5.26E-06    | 8.525347347  | 0         |
| novel-chi-miR1851-5p | -8.303780748 | 0.001915172 | 8.303780748  | 1.23E-05    |              |           |
| novel-chi-miR1878-5p | 0.986315189  | 9.39E-100   | 4.409956588  | 7.11E-223   | 5.396271777  | 0         |
| novel-chi-miR2002-5p | 13.80413102  | 9.55E-99    | -8.764871591 | 0.003803483 | 5.03925943   | 6.84E-279 |
| novel-chi-miR2265-3p | 4.479780264  | 2.37E-08    |              |             | 9.479780264  | 2.60E-14  |
| novel-chi-miR434-3p  | 2.113228978  | 8.57E-24    | -2.127111918 | 4.66E-05    | -0.01388294  | 2.70E-24  |
| novel-chi-miR494-5p  | 4.837627933  | 1.42E-10    | -1.339850003 | 0.965187582 | 3.49777793   | 2.75E-19  |

|                         |                 |          |                 |          |                 |           |
|-------------------------|-----------------|----------|-----------------|----------|-----------------|-----------|
| novel-chi-mi<br>R893-3p | 2.99760334<br>3 | 3.58E-66 | 1.4716406<br>76 | 3.53E-10 | 4.4692440<br>19 | 5.06E-156 |
| novel-chi-mi<br>R920-3p | 5.12014236<br>3 | 3.31E-35 |                 |          | 11.689997<br>97 | 7.68E-49  |

**Table S2.** Reads quality statistics after sample filtration (mRNA).

| Sample  | Total Raw Reads (million) | Total Clean Reads (million) | Total Clean Bases (Gb) | Clean Reads Q20 (%) | Clean Reads Q30 (%) | Clean Reads Ratio (%) |
|---------|---------------------------|-----------------------------|------------------------|---------------------|---------------------|-----------------------|
| P_D5-1  | 114.86                    | 111.93                      | 11.19                  | 98.45               | 95.39               | 97.45                 |
| P_D5-2  | 114.94                    | 112.28                      | 11.23                  | 98.12               | 94.42               | 97.68                 |
| P_D15-1 | 114.94                    | 112.82                      | 11.28                  | 98.72               | 96.04               | 98.15                 |
| P_D15-2 | 114.94                    | 112.34                      | 11.23                  | 98.69               | 95.97               | 97.74                 |
| P_D18-1 | 114.94                    | 111.99                      | 11.2                   | 98.46               | 95.36               | 97.43                 |
| P_D18-2 | 114.94                    | 112.94                      | 11.29                  | 97.62               | 93.37               | 98.26                 |

**Table S3.** Reads quality statistics after sample filtration (small RNA).

| Sample  | Sequence Type | Raw Tag Count | Low Quality Tag Count | Invalid Adapter Tag Count | Poly A Tag Count | Short Valid Length Tag | Clean Tag Count | Q20 of Clean Tag | Percent age of Clean Tag (%) |
|---------|---------------|---------------|-----------------------|---------------------------|------------------|------------------------|-----------------|------------------|------------------------------|
| P_D5-1  | SE50          | 3.77E+07      | 128949                | 469080                    | 554              | 907085                 | 3.62E+07        | 99               | 96.01                        |
| P_D5-2  | SE50          | 3.77E+07      | 135380                | 559527                    | 586              | 2527293                | 3.45E+07        | 98.9             | 91.46                        |
| P_D15-1 | SE50          | 3.27E+07      | 90699                 | 532297                    | 1319             | 905071                 | 3.12E+07        | 98.6             | 95.32                        |
| P_D15-2 | SE50          | 3.17E+07      | 83857                 | 514662                    | 1745             | 1421128                | 2.96E+07        | 98.6             | 93.61                        |
| P_D18-1 | SE50          | 3.77E+07      | 129863                | 507805                    | 1786             | 1322729                | 3.58E+07        | 98.9             | 94.8                         |
| P_D18-2 | SE50          | 4.23E+07      | 144057                | 1046304                   | 5196             | 1.10E+07               | 3.00E+07        | 99               | 71.08                        |

**Table S4.** Comparison information statistical table (mRNA).

| Sample  | Total Clean Reads (M) | Total Mapping(%) | Uniquely Mapping(%) |
|---------|-----------------------|------------------|---------------------|
| P_D5-1  | 111.93                | 72.88            | 46.63               |
| P_D5-2  | 112.28                | 72.36            | 48.52               |
| P_D15-1 | 112.82                | 70.03            | 48.85               |
| P_D15-2 | 112.34                | 40               | 25.22               |
| P_D18-1 | 111.99                | 52.01            | 32.18               |

|         |        |       |     |
|---------|--------|-------|-----|
| P_D18-2 | 112.94 | 16.16 | 9.6 |
|---------|--------|-------|-----|

**Table S5.** Comparison information statistical table (small RNA).

| Sample  | Total Clean Reads (M) | Total Mapping(%) |
|---------|-----------------------|------------------|
| P_D5-1  | 34.56                 | 96.31            |
| P_D5-2  | 32.93                 | 97.86            |
| P_D15-1 | 29.74                 | 94.7             |
| P_D15-2 | 28.26                 | 94.72            |
| P_D18-1 | 34.13                 | 88.89            |
| P_D18-2 | 28.64                 | 82.62            |
